# THE AMERICAN JOURNAL OF PSYCHIATRY

---

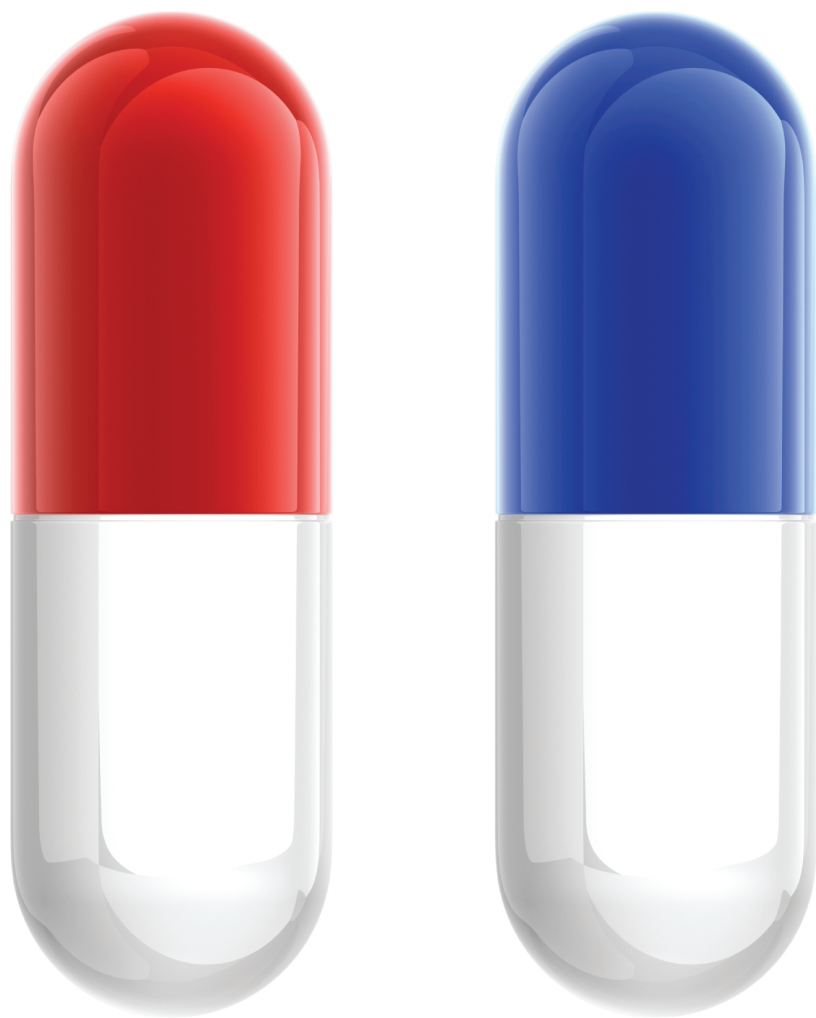

- ◀ **When Is Polypharmacy an Advantage?**  
Carol A. Tamminga, M.D. 663
- ◀ **Combining Medications to Enhance Depression Outcomes (CO-MED): Acute and Long-Term Outcomes of a Single-Blind Randomized Study**  
A. John Rush, M.D., et al. 689
- ◀ **Effectiveness of Switching From Antipsychotic Polypharmacy to Monotherapy**  
Susan M. Essock, Ph.D., et al. 702
- ◀ **Gabapentin Combined With Naltrexone for the Treatment of Alcohol Dependence**  
Raymond F. Anton, M.D., et al. 709
- Continuing Medical Education** 757

**July 2011**

**Volume 168 • Number 7**

---

Official Journal of the  
AMERICAN PSYCHIATRIC ASSOCIATION

---

[ajp.psychiatryonline.org](http://ajp.psychiatryonline.org)
