# get CME from AJP

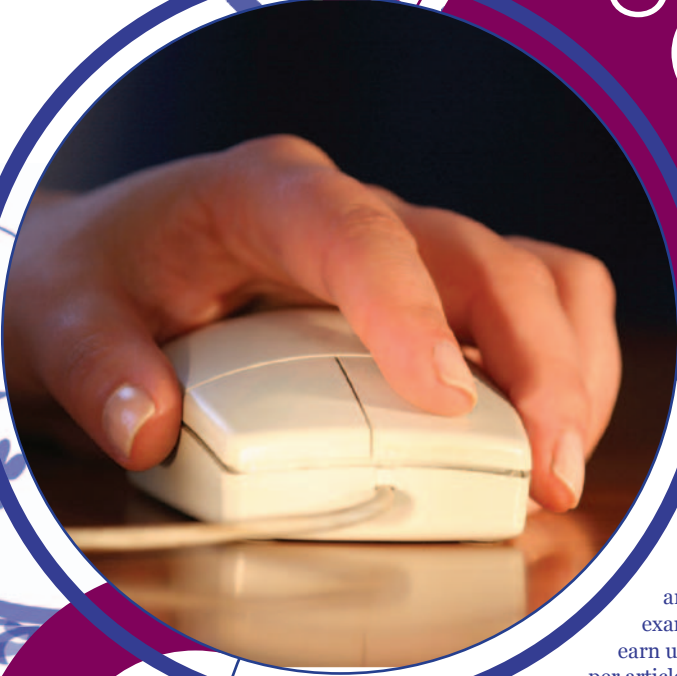

Brief companion exams are created for three of the most influential articles from each issue. By reading the articles and completing the online exams, you can test your knowledge and earn up to 1 *AMA PRA Category 1 Credit™* per article. Correct answers are highlighted for your reference upon completion of the course. A link from the question to the correct answer in context will also be highlighted in the associated article, thus extending the learning experience.

CME credit is only provided online, and a subscription to the AJP CME program is required. From the moment you subscribe to the AJP CME program, you will be able to select from 72 courses from among 40 possible subject areas. You'll also be able to access the next 33 courses as they become available. For more information and pricing, please go to <http://cme.psychiatryonline.org/misc/aboutajpcme.shtml>

This activity is sponsored by the American Psychiatric Association. The American Psychiatric Association is accredited by the Accreditation Council for Continuing Medical Education to provide continuing medical education for physicians. The American Psychiatric Association designates each educational activity for a maximum of 1 *AMA PRA Category 1 Credit™*. Physicians should only claim credit commensurate with the extent of their participation in the activity.

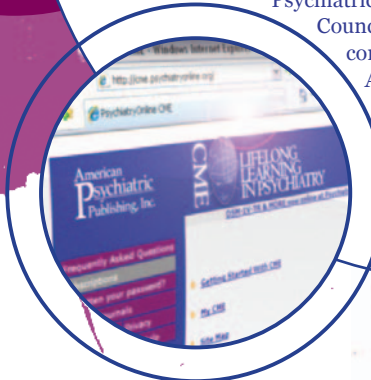

Fulfill your CME requirement while staying current on the latest advances in psychiatry.  
Subscribe to AJP CME!

# The Residents' JOURNAL

The Residents' JOURNAL  
a publication of  
The American Journal of Psychiatry

June 2011      Volume 6      Issue 6

**Inside**

- 1 In This Issue
- 2 Handoff  
Joseph M. Cerimele, M.D.
- 3 Assessment of Psychosocial Functioning in Adolescents With Bipolar Depression  
Arman Danielyan, M.D.
- 6 Psychopharmacology Curricula: A Call for Innovation  
Ragy Girgis, M.D.
- 8 The Effect of Social Media on Mental Health and Its Relevancy to Residency Training  
Erin L. Belfort, M.D.
- 10 Religion and Spirituality in Psychiatry Training Programs  
Mary E. Camp, M.D.
- 12 Book Review  
Emily Gastelum, M.D.
- 13 Test Your Knowledge
- 14 Residents' Journal Info

**In This Issue**



Ongoing Internet and social media revolution, discoveries of newer psychopharmacologic agents, and a diversifying U.S. population underscore the need for continuously updating and validating psychiatry residency curricula. An immense undertaking of this sort usually begins with the small step of describing the issues at hand. Thus, it is fitting that the last issue of this academic year's *Residents' Journal* includes articles on psychosocial functioning in pediatric bipolar disorder (Arman Danielyan, M.D.), psychopharmacology education (Ragy Girgis, M.D.), the effect of social media on mental health (Erin L. Belfort, M.D.), and religion and spirituality in residency training programs (Mary E. Camp, M.D.). I sincerely hope that these contributions will initiate a dialogue about the need for timely revitalization of residency curricula with changes that are reflective of current times.

Deepak Prabhakar, M.D., M.P.H., Guest Section Editor  
Detroit Medical Center/ Wayne State University

Editor-in-Chief  
Joseph M. Cerimele, M.D.

Associate Editor  
Sarah M. Fayad, M.D.

Editors Emeriti  
Sarah B. Johnson, M.D.  
Wally McVoy, M.D.

Guest Section Editor  
Deepak Prabhakar, M.D.

Staff Editor  
Angela Moore

The Residents' Journal accepts manuscripts authored by medical students, resident physicians, and fellows. To submit your paper, please visit the manuscript submission site at [mc.manuscriptcentral.com/appi-ajp](http://mc.manuscriptcentral.com/appi-ajp) and either create an account or use your existing account. For manuscript type, select "Residents." Then follow the instructions to upload your manuscript. Residents who are interested in participating as Guest Section Editors should e-mail the Residents' Journal Editor-in-Chief Sarah M. Fayad at [fayad@ufl.edu](mailto:fayad@ufl.edu).

See the September 2010 issue for details on the new peer review process.

The Residents' Journal is sent free-of-charge to all psychiatry residents. Anyone interested in being included on the distribution list should contact Angela Moore, the Residents' Journal staff editor at [ajp@psych.org](mailto:ajp@psych.org) with "Subscribe to Residents' Journal" in the subject line.

**Upcoming Issue Themes**  
July: Suicide  
August: Clinical Trials

To access the complete Residents' Journal archives, visit [ajp.psychiatryonline.org/misc/Residents\\_Journal.dtl](http://ajp.psychiatryonline.org/misc/Residents_Journal.dtl)

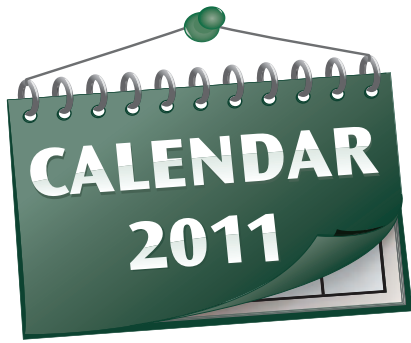

*For free listing of your organization's official annual or regional meeting, please send us the following information: sponsor, location, inclusive dates, type and number of continuing education credits (if available), and the name, address, and telephone number of the person or group to contact for more information. In order for an event to appear in our listing, all notices and changes must be received at least 6 months in advance of the meeting and should be addressed to:*

*Calendar, American Journal of Psychiatry, 1000 Wilson Boulevard, Suite 1825, Arlington, VA 22209-3901, [swstrate@psych.org](mailto:swstrate@psych.org) (e-mail).*

*Because of space limitations, only listings of meetings of the greatest interest to Journal readers will be included.*

---

## SEPTEMBER

**June 15–September 15**, Abstract submissions open for May 2012 Annual Meeting of the American Psychiatric Association.

---

## OCTOBER

**October 5–8**, II International Congress, Dual Disorders, Addictive Behaviors and other Mental Disorders, Barcelona, Spain. Contact: SEPD, [www.cipd2011.com](http://www.cipd2011.com) (web site).

**October 18–23**, 58th Annual Meeting of the American Academy of Child and Adolescent Psychiatry, Toronto, Ontario. Contact: AACAP, 3615 Wisconsin Avenue, N.W., Washington, DC 20016-3007; (202) 966-7300 (tel), (202) 966-2891 (fax), [meetings@aacap.org](mailto:meetings@aacap.org) (e-mail), [www.aacap.org](http://www.aacap.org) (web site).

**October 27–30**, 63rd Institute on Psychiatric Services, American Psychiatric Association, San Francisco, CA. Contact: APA Annual Meetings Dept., 1000 Wilson Blvd., Ste. 1825, Arlington, VA 22209; (703) 907-7815.

---

## NOVEMBER

**November 1–December 5**, Poster submissions open for May 2012 Annual Meeting of the American Psychiatric Association.

---

## DECEMBER

**December 4–8**, 50th Annual Meeting, American College of Neuropsychopharmacology, Waikaloa Beach, Hawaii. Contact: [acnp@acnp.org](mailto:acnp@acnp.org); (615) 324-2360.

---

## MARCH 2012

**March 21–24**, 23rd Annual Meeting, American Neuropsychiatric Association, New Orleans, La. Contact: (614)447-2077 or visit [www.anpaonline.org](http://www.anpaonline.org) (web site).

---

## MAY 2012

**May 5–9**, 165th Annual Meeting, American Psychiatric Association, Philadelphia, Pa. Contact: APA Annual Meetings Dept., 1000 Wilson Blvd., Ste. 1825, Arlington, VA 22209; (703) 907-7815.

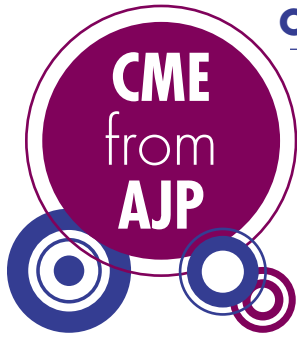

## Continuing Medical Education

Three articles in this issue form the basis of a short course with questions that can be answered for up to 1 *AMA PRA Category 1 Credit™* each by visiting <http://cme.psychiatryonline.org/> and clicking on “American Journal of Psychiatry CME.”

CME credit is issued only online, and a paid subscription to the AJP CME course program is required.

This month's courses appear on pages 757–760.

**FREE AUDIO!**

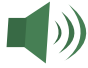

## Have You Heard?

You can listen to highlights of *The American Journal of Psychiatry* by downloading a monthly free .mp3 audio file from our web site (<http://ajp.psychiatryonline.org/misc/audio.dtl>) or by subscribing to the AJP Audio podcast at iTunes or other feed reader (e.g., NewzCrawler, FeedDemon, Bloglines, Google Reader). Presented by Deputy Editor Dr. Susan Schultz or by Editorial Director Michael Roy, each month's audio lasts approximately 30 minutes and covers several research articles, the Treatment in Psychiatry feature, and one or two editorials.

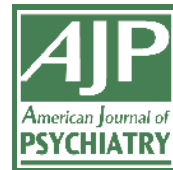

**Coming in the August 2011 issue\***

## THE AMERICAN JOURNAL OF PSYCHIATRY

### At Clinical High Risk for Psychosis: Outcome for Nonconverters

J. Addington, B.A. Cornblatt, K.S. Cadenhead, T.D. Cannon, T.H. McGlashan, D.O. Perkins, L.J. Seidman, M.T. Tsuang, E.F. Walker, S.W. Woods, and R. Heinsen

### Cognitive Effects of Atypical Antipsychotic Medications in Patients With Alzheimer's Disease: Outcomes From CATIE-AD

C.L.P. Vigen, W.J. Mack, R.S.E. Keefe, M. Sano, D.L. Sultzer, T.S. Stroup, K.S. Dagerman, J.K. Hsiao, B.D. Lebowitz, C.G. Lyketsos, P.N. Tariot, L. Zheng, and L.S. Schneider

### A Genome-Wide Significant Linkage for Severe Depression on Chromosome 3: The Depression Network Study

G. Breen, B.T. Webb, A.W. Butler, E.J.C.G. van den Oord, F. Tozzi, N. Craddock, M. Gill, A. Korszun, W. Maier, L. Middleton, O. Mors, M.J. Owen, S. Cohen-Woods, J. Perry, N.W. Galwey, R. Upmanyu, I. Craig, C.M. Lewis, M. Ng, S. Brewster, M. Preisig, M. Rietschel, L. Jones, J. Knight, J. Rice, P. Muglia, A.E. Farmer, and P. McGuffin

### A 3p26-3p25 Genetic Linkage Finding for DSM-IV Major Depression in Heavy Smoking Families

M.L. Pergadia, A.L. Glowinski, N.R. Wray, A. Agrawal, S.F. Saccone, A. Loukola, U. Broms, T. Korhonen, B.W.J.H. Penninx, J.D. Grant, E.C. Nelson, A.K. Henders, A.J. Schrage, Y.-L. Chou, K. Keskitalo-Vuokko, Q. Zhu, S.D. Gordon, J.M. Vink, E.J.C. de Geus, S. MacGregor, J.Z. Liu, G. Willemsen, S.E. Medland, D.I. Boomsma, G.W. Montgomery, J.P. Rice, A.M. Goate, A.C. Heath, J. Kaprio, N.G. Martin, and P.A.F. Madden

\*Can't wait? Visit [ajp.psychiatryonline.org](http://ajp.psychiatryonline.org) and click the “AJP in Advance” logo to see all articles uploaded in advance of print!

# READ The American Journal of PSYCHIATRY ONLINE

## ONLINE BENEFITS

### AJP in Advance

Receive key research articles posted on the AJP website well in advance of their appearance in print.

### Back Issue Access

Gain access to back issues starting with Volume 1, Issue 1 of the American Journal of Insanity in 1844. (Available to institutions as a separate one-time purchase.)

### AJP CME

Take interactive quizzes that offer AMA PRA Category 1 Credits™ for selected articles from each issue (with paid subscription to the CME Course Program).

### AJP Audio

Listen to MP3-format program summarizing findings from key articles from each issue.

### Residents' Journal

Read additional AJP articles and features that have most value to residents in their training.

### Powerful Searching

Search by author, keyword, and/or citation details—within any one journal, across the entire PsychiatryOnline journal collection, or across all HighWire journals.

### PubMed, CrossRef, and Google Scholar links

Explore everything from cited references to abstracts and full text; to similar articles; to other articles by the same lead authors.

### eTOCs

Get advanced email alerts with the table of contents of the latest issue.

ACTIVATE  
NOW!

IT'S AS EASY AS...

2 Under  
SUBSCRIBE  
NOW, click  
“Activate  
Your Online  
Access”

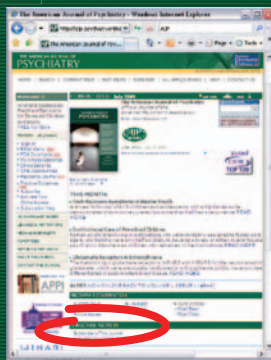

3 Enter your APA Member Number. (This can be found on your mailing label.)

AJP 3000056866 CAR-RT LOT88 C-105  
John Q Sample  
Mental Health Professional  
1000 Wilson Blvd STE 1825  
Arlington VA 22209-3924 01654

\*In most cases the number on your label will be your Member Number; if it is not, enter your APA Member Number (with enough leading zeros to create 10 digits).

For more information or if you cannot locate your customer number, please contact APPI Customer Service:

1.800.368.5777  
APPI@PSYCH.ORG

## Contents

- A1 Editorial Board  
A3 Highlights of this issue

## Editorials

- 1 **Transforming mental health services**  
D. Kingdon
- 3 **Detection of bipolar disorder**  
A. H. Young and H. MacPherson
- 5 **The case for early intervention in anorexia nervosa: theoretical exploration of maintaining factors**  
J. Treasure and G. Russell
- 7 **Scored – poems by doctors**  
Peter Wells
- 8 **Cross-cultural attitudes to help-seeking among individuals who are suicidal: new perspectives for policy-makers**  
A. Pilman and D. P. J. Osborn

## Special article

- 11 **The four dimensions: a model for the social aetiology of psychosis**  
J. Shah, R. Mizrahi and K. McKenzie

## Review article

- 15 **Long-term psychodynamic psychotherapy in complex mental disorders: update of a meta-analysis**  
F. Leichsenning and S. Rabung

## Papers

- 23 **Mental well-being and mental illness: findings from the Adult Psychiatric Morbidity Survey for England 2007**  
S. Weich, T. Brugha, M. King, S. McManus, P. Bebbington, R. Jenkins, C. Cooper, O. McBride and S. Stewart-Brown
- 29 **Childhood sexual abuse and psychosis: data from a cross-sectional national psychiatric survey in England**  
P. Bebbington, S. Jonas, E. Kuipers, M. King, C. Cooper, T. Brugha, H. Meltzer, S. McManus and R. Jenkins
- 37 **Letter to Father – extra**  
Franz Kafka
- 38 **Childhood abuse, the BDNF-Val66Met polymorphism and adult psychotic-like experiences**  
S. Alemamy, B. Arias, M. Aguilera, H. Villa, J. Moya, M. I. Ibáñez, H. Vossen, C. Gastó, G. Ortet and L. Fañanás
- 43 **War exposure, 5-HTTLPR genotype and lifetime risk of depression**  
S. Artero, J. Touchon, A.-M. Dupuy, A. Malafosse and K. Ritchie

- 48 **Melancholia – 100 words**  
Alistair Stewart

- 49 **Unrecognised bipolar disorder in primary care patients with depression**  
D. J. Smith, E. Griffiths, M. Kelly, K. Hood, N. Craddock and S. A. Simpson
- 57 **Valproate v. lithium in the treatment of bipolar disorder in clinical practice: observational nationwide register-based cohort study**  
L. V. Kessing, G. Hellmund, J. R. Geddes, G. M. Goodwin and P. K. Andersen
- 64 **Treatment of suicidal people around the world**  
R. Bruffaerts, K. Demyttenaere, I. Hwang, W.-T. Chiu, N. Sampson, R. C. Kessler, J. Alonso, G. Borges, G. de Girolamo, R. de Graaf, S. Florescu, O. Gureje, C. Hu, E. G. Karam, N. Kawakami, S. Kostyuchenko, V. Kovess-Masfety, S. Lee, D. Levinson, H. Matschinger, J. Posada-Villa, R. Sagar, K. M. Scott, D. J. Stein, T. Tomov, M. C. Viana and M. K. Nock
- 71 **Impact of crisis resolution and home treatment teams on psychiatric admissions in England**  
R. Jacobs and F. Barrenho

## Columns

- 77 Correspondence  
78 Book reviews  
82 Contents of *Advances in Psychiatric Treatment*  
83 Contents of the *American Journal of Psychiatry*  
84 From the Editor's desk

## Cover picture

Graham Foster (b. 1970).  
*The Mechanics of Addiction* (2010).  
Acrylic on wood 40" x 40"

Graham Foster is a Bermudan painter and sculptor. He writes:

"Some years ago I began a series of paintings inspired by addiction, after helping a close friend overcome the trauma of their addiction. I wanted to capture the inner workings of the mind in this state, and the "devil inside" triggering various forms of addiction. Some of these paintings have a sculptural quality about them – rather like a dissected automaton or robot – reflecting our potential lack of control, even against our better judgement, as a proclivity to addiction lies just below the surface.

For more information on the artist please visit [www.grahamfoster.com](http://www.grahamfoster.com)

We are always looking for interesting and visually appealing images for the cover of the *Journal* and would welcome suggestions or pictures, which should be sent to Dr Allan Beveridge, British Journal of Psychiatry, 17 Belgrave Square, London SW1X 8PG, UK or [bjp@rcpsych.ac.uk](mailto:bjp@rcpsych.ac.uk).

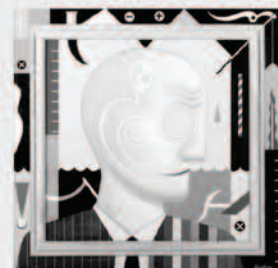

Source: https://ajp.psychiatryonline.org/doi/suppl/10.1176/ajp.2011.168.issue-7/suppl_file/front.pdf
